# Supplementary material
Source: Springer Nature journal article supplement (https://www.springermedizin.de/resource/supplementary/12874_2013_1060_MOESM2_ESM.pdf/9433436)
Supplement: MOESM2 [file 9433436]

**Additional file 2**

**Section Two                      Communication Networks**

**In this section we are interested in people who are seen locally as having a significant influence on how service-users with schizophrenia are managed in the area.**

- 19                      Are there any people within your team who you feel strongly influence local practice in the field of schizophrenia management?**

Please give their names and job roles

.....

.

.....

.....

.....

- 20                      Are there any people outside of your team who you think are seen locally as 'leaders' in the field of schizophrenia management?**

Please give their names and job roles

.....

.

.....

.....

.....
